## Erratum

**Erratum to: The utility of magnetic resonance imaging lesion combinations in the sacroiliac joints for diagnosing patients with axial spondyloarthritis. A prospective study of 204 participants including post-partum women, patients with disc herniation, cleaning staff, runners and healthy persons**

Sengül Seven <sup>1,2</sup>, Mikkel Østergaard <sup>1,2</sup>, Lone Morsel-Carlsen<sup>3</sup>, Inge Juul Sørensen<sup>1</sup>, Birthe Bonde<sup>4</sup>, Gorm Thamsborg<sup>1</sup>, Jens Jørgen Lykkegaard<sup>1</sup>, Oliver Hendricks<sup>5</sup>, Niklas Rye Jørgensen<sup>6,7</sup> and Susanne Juhl Pedersen <sup>1,2</sup>

Rheumatology 2020;59:3237–49.  
doi:10.1093/rheumatology/keaa096

In Table 3, in the first row, ‘Number of participants’, all numbers had accidentally been moved one column to the left. This has now been corrected. The Publisher apologises for the error.

<sup>1</sup>Copenhagen Center for Arthritis Research, Center for Rheumatology and Spine Diseases, Center of Head and Orthopedics, Rigshospitalet Glostrup, Glostrup, Denmark, <sup>2</sup>Department of Clinical Medicine, University of Copenhagen, Copenhagen, Denmark, <sup>3</sup>Department of Radiology, Rigshospitalet Glostrup, Glostrup, Denmark, <sup>4</sup>Birthe Bonde Clinic of Physiotherapy, Copenhagen, Denmark, <sup>5</sup>Danish Hospital for Rheumatic Diseases, Sønderborg, Denmark, <sup>6</sup>University of Southern Denmark, Odense, Denmark and <sup>7</sup>Department of Clinical Biochemistry, Rigshospitalet Glostrup, Glostrup, Denmark

Correspondence to: Sengül Seven, Rigshospitalet Glostrup, Copenhagen Center for Arthritis Research, Center for Rheumatology and Spine Diseases, Center of Head and Orthopedics, Valdemar Hansens Vej 17, 2600 Glostrup, Denmark. E-mail: Sengul.seven@dadlnet.dk
